# Supplementary material
Source: Springer Nature journal article supplement (https://www.springermedizin.de/resource/supplementary/12882_2012_391_MOESM3_ESM.pdf/9453464)

**All Cause Mortality**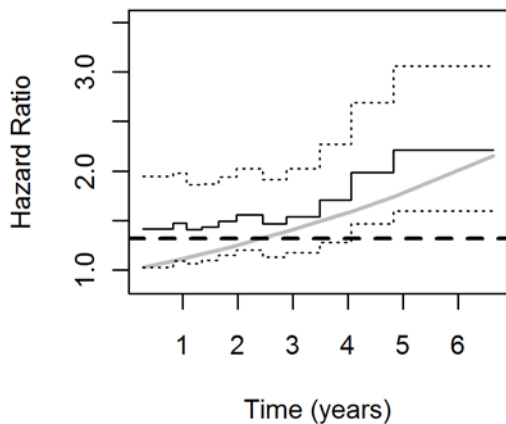**Cardiac Mortality**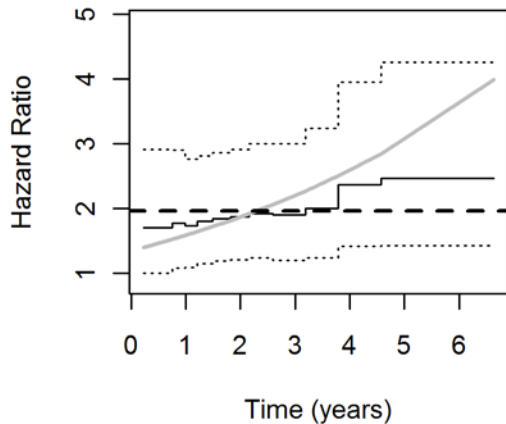**Cardiovascular Mortality**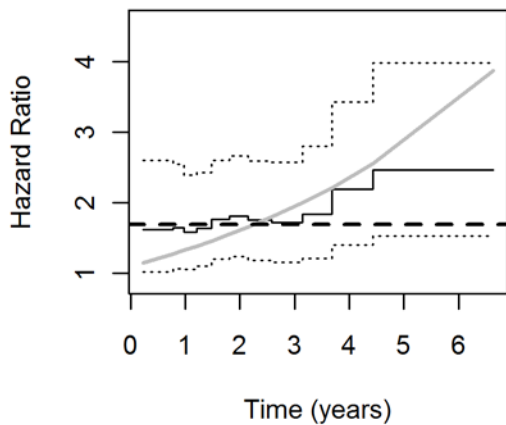**Infectious Mortality**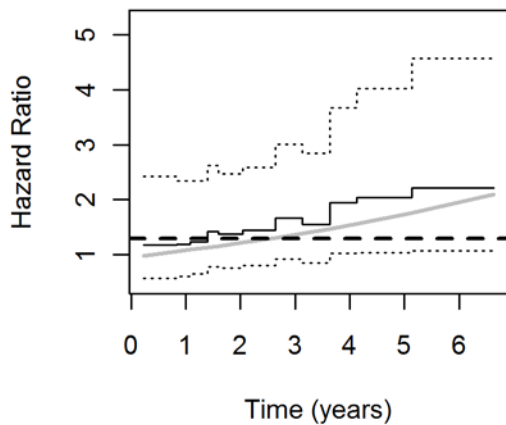

Supplement: MOESM3 [file 9453464]
